# Supplementary material for: The Influence of Microfungi on the Mycelial Growth of Ectomycorrhizal Fungus Tricholoma matsutake
Source: MDPI journal article supplement (doi:10.3390/microorganisms7060169), 2019-06-07
Supplement: s1 [file s1]

**Table S1. The number of PM fairy rings harboring the microfungal species.**

| Species name                     | Effect <sup>1)</sup> | Location <sup>2)</sup> | The number of fairy ring |    |    |    |    |
|----------------------------------|----------------------|------------------------|--------------------------|----|----|----|----|
|                                  |                      |                        | Total                    | HC | UJ | YD | PH |
| <i>Penicillium adametzii</i>     | Positive             | 2                      | 2                        | 1  | 0  | 1  | 0  |
| <i>Penicillium bissettii</i>     | Negative             | 3                      | 7                        | 2  | 3  | 2  | 0  |
| <i>Penicillium daleae</i>        | Negative             | 1                      | 1                        | 0  | 0  | 0  | 1  |
| <i>Penicillium glabrum</i>       | Positive             | 2                      | 4                        | 0  | 0  | 1  | 3  |
| <i>Penicillium montanense</i>    | Negative             | 1                      | 3                        | 3  | 0  | 0  | 0  |
| <i>Penicillium nodositatum</i>   | Negative             | 1                      | 1                        | 0  | 1  | 0  | 0  |
| <i>Penicillium ochrochloron</i>  | Positive             | 1                      | 1                        | 1  | 0  | 0  | 0  |
| <i>Penicillium oxalicum</i>      | Positive             | 1                      | 1                        | 0  | 0  | 0  | 1  |
| <i>Penicillium pancosmium</i>    | Positive             | 1                      | 1                        | 0  | 1  | 0  | 0  |
| <i>Penicillium paraherquei</i>   | Neutral              | 2                      | 2                        | 1  | 1  | 0  | 0  |
| <i>Penicillium samsonianum</i>   | Negative             | 1                      | 2                        | 2  | 0  | 0  | 0  |
| <i>Penicillium swiecickii</i>    | Negative             | 1                      | 1                        | 0  | 1  | 0  | 0  |
| <i>Penicillium terrigenum</i>    | Negative             | 1                      | 2                        | 0  | 0  | 0  | 2  |
| <i>Penicillium</i> sp.1          | Neutral              | 1                      | 2                        | 0  | 0  | 2  | 0  |
| <i>Penicillium</i> sp.2          | Neutral              | 2                      | 2                        | 1  | 1  | 0  | 0  |
| <i>Penicillium</i> sp.3          | Negative             | 1                      | 1                        | 0  | 0  | 1  | 0  |
| <i>Clonostachys rosea</i>        | Neutral              | 3                      | 3                        | 1  | 1  | 1  | 0  |
| <i>Trichoderma hamatum</i>       | Negative             | 1                      | 1                        | 1  | 0  | 0  | 0  |
| <i>Trichoderma songyi</i>        | Negative             | 3                      | 3                        | 1  | 1  | 1  | 0  |
| <i>Trichoderma spirale</i>       | Negative             | 1                      | 1                        | 0  | 0  | 1  | 0  |
| <i>Trichoderma</i> sp.           | Positive             | 3                      | 4                        | 1  | 0  | 1  | 2  |
| <i>Sarocladium kiliense</i>      | Neutral              | 1                      | 2                        | 2  | 0  | 0  | 0  |
| <i>Purpureocillium lilacinum</i> | Neutral              | 4                      | 6                        | 1  | 2  | 1  | 2  |
| <i>Mortierella alpina</i>        | Positive             | 3                      | 3                        | 1  | 1  | 0  | 1  |
| <i>Mortierella verticillata</i>  | Positive             | 3                      | 5                        | 1  | 0  | 1  | 3  |
| <i>Mucor zonatus</i>             | Positive             | 1                      | 1                        | 1  | 0  | 0  | 0  |
| <i>Umbelopsis isabellina</i>     | Positive             | 2                      | 2                        | 1  | 0  | 1  | 0  |
| <i>Umbelopsis nana</i>           | Positive             | 3                      | 4                        | 2  | 0  | 1  | 1  |

1) The effect type of microfungal species on the PM growth

2) The number of locations harboring the microfungal species
